# Supplementary material
Source: PubMed Central journal article supplement (PMC3830663)
Supplement: NIHMS508422-supplement.pdf [file NIHMS508422-supplement.pdf]

# eFigure 1: Performing Detrended Fluctuation Analysis

Identify QRS complexes on Lead II EKG

**A. Identify QRS complexes**

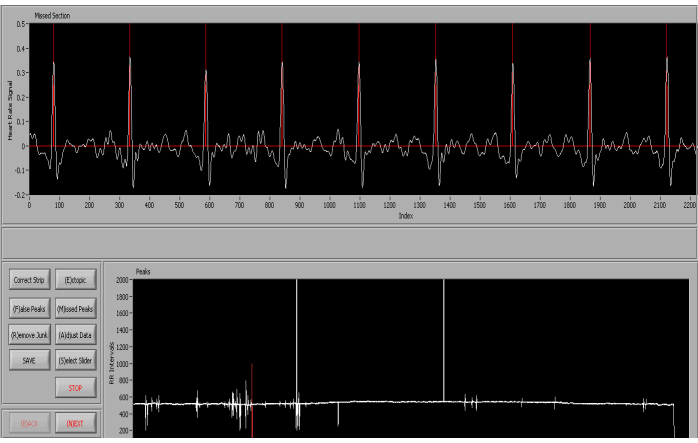

Plot time between successive QRS complexes, RR

**B. Tachogram**

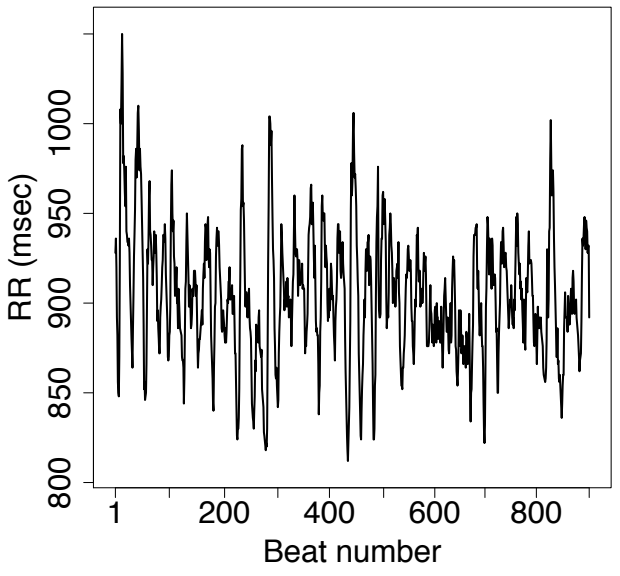

**C. Tachogram segmented at 100-beat intervals**

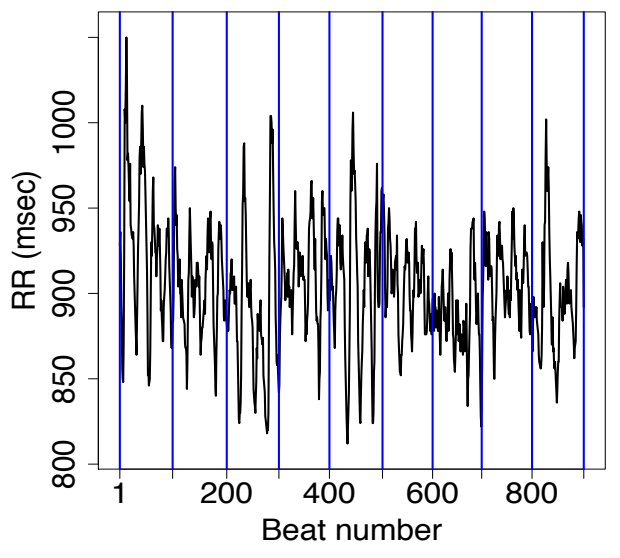

**D. Tachogram with segmented linear regression**

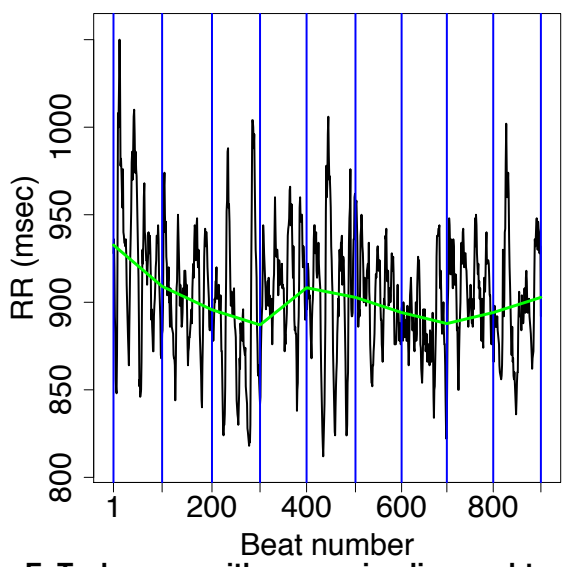

**E. Tachogram with regression lines subtracted**

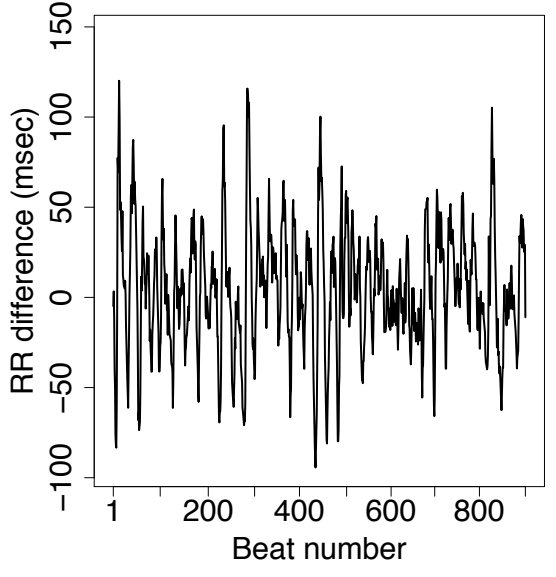

Generate log-log plot of window size vs. fluctuation

**F. Scaling Coefficients after Detrended Fluctuation Analysis**

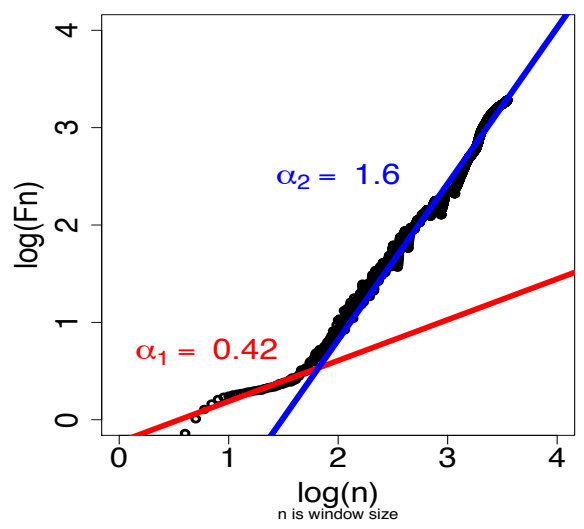

eFigure 2: Relationship between LF:VLF and Scaling Coefficients

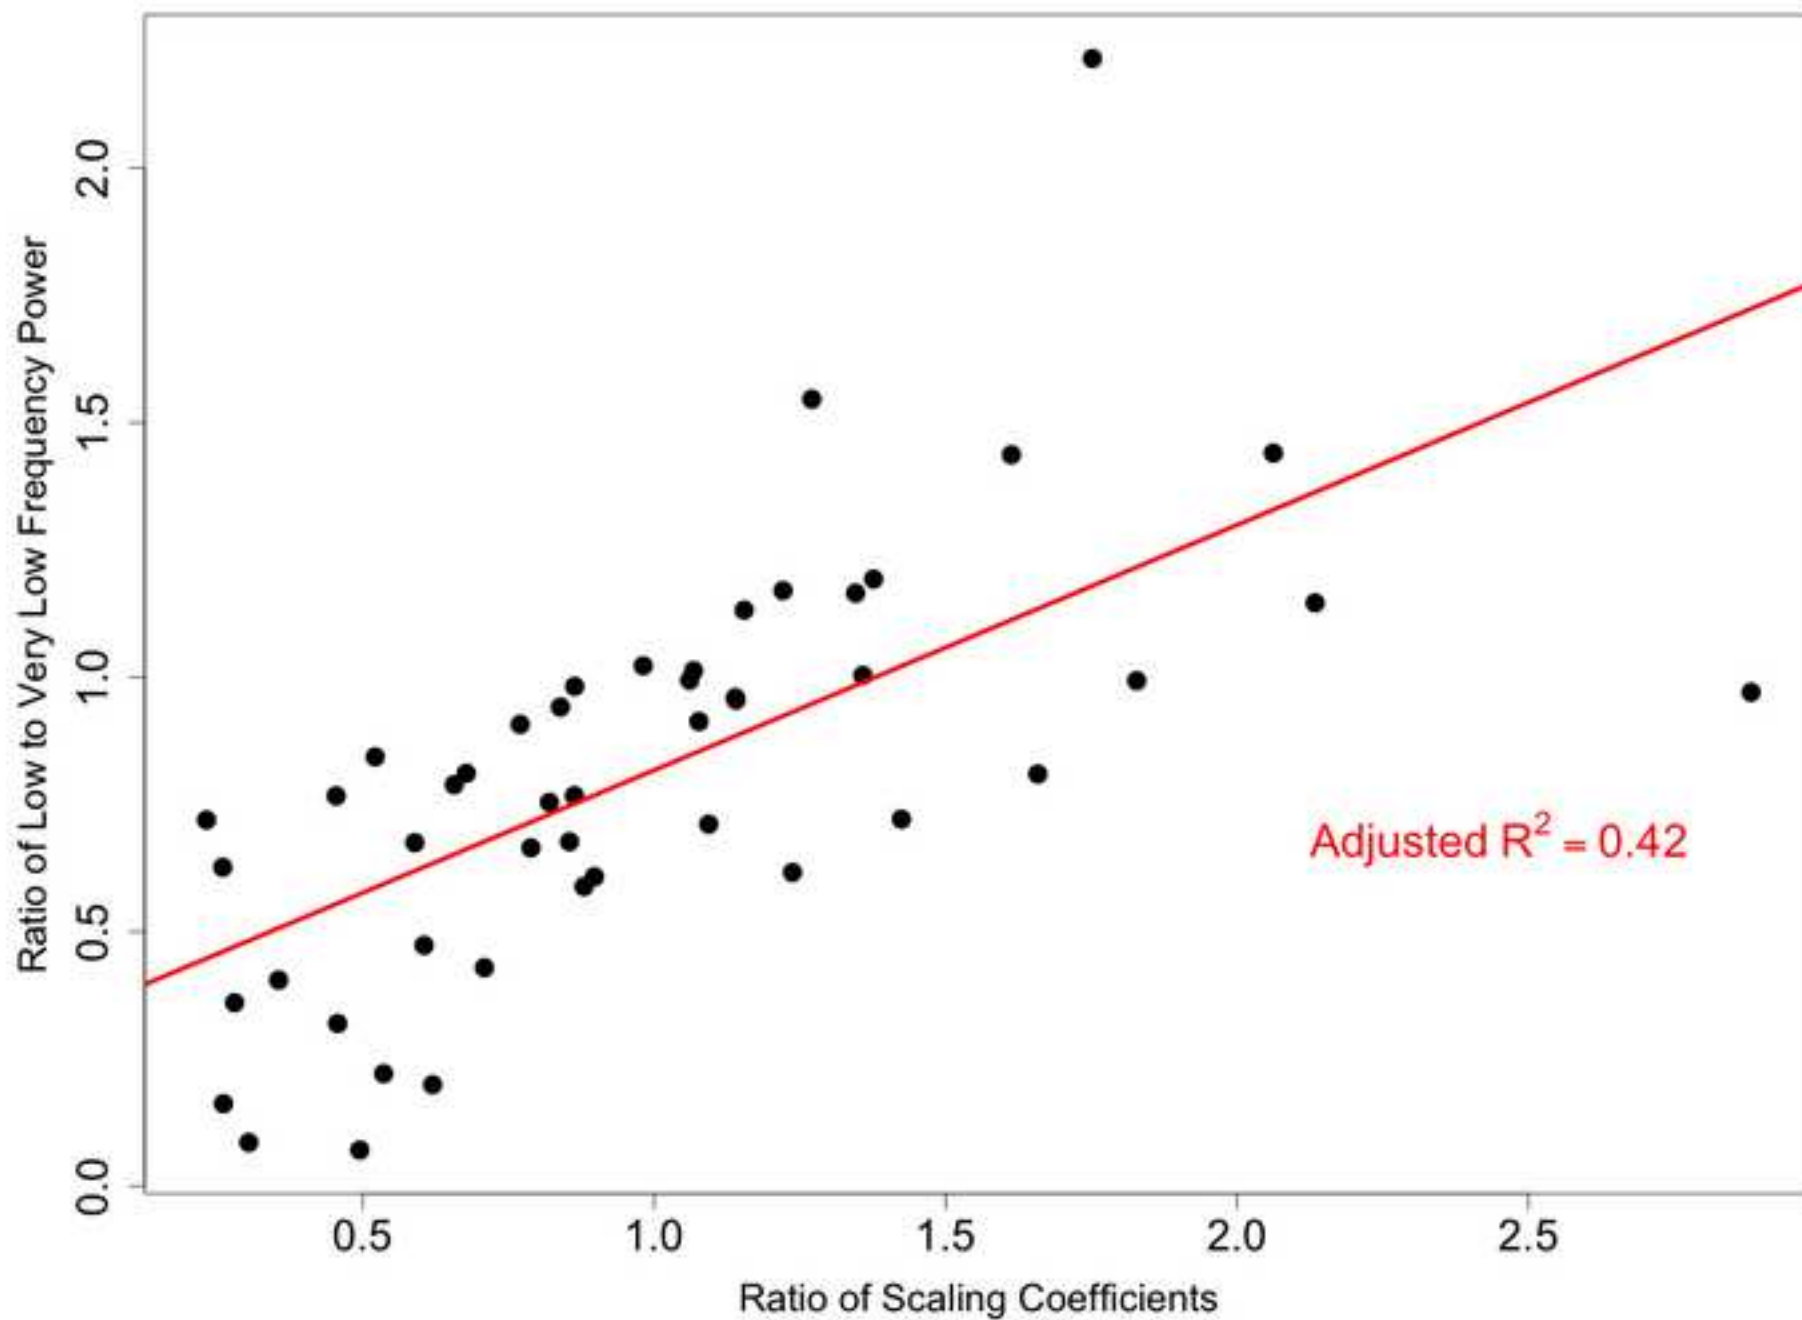

## Appendix: Time, Frequency, and Complexity Domain Metrics from tachogram

Time Domain:

The mean  $\mu$  was calculated as

$$\mu = \sum_{i=0}^{n-1} \frac{x_i}{n}$$

where  $n$  is the number of samples in  $X$ . The variance is calculated as

$$\sigma^2 = \sum_{i=0}^{n-1} \frac{(x_i - \mu)^2}{n - 1}$$

The square root of the variance is the standard deviation of the signal. The root mean square (*RMS*) value of the signal is calculated as

$$RMS = \sqrt{\frac{1}{n} \sum_{i=0}^{n-1} |x_i|^2}$$

Frequency Domain:

Welch's method was used to estimate the power spectra.[1] This method separates the time signal into  $K$  successive blocks of length  $M$  samples each, multiplies each block with a window function  $w(n)$ , calculates the squared magnitude of the Fourier transform of each windowed block, and then averages the results to obtain the estimated power spectrum  $\hat{S}_k^W(f_k)$  is defined as follows:

$$\hat{S}_k^W(f_k) = \frac{1}{K \sum_{n=0}^{M-1} w(n)^2} \sum_{m=0}^{K-1} \left| \sum_{n=0}^{M-1} x_m(n) e^{-j2\pi nk/N} \right|^2$$

where  $x_m(n)$  represents the  $m$ th block of data and  $N$  is the FFT size. The original time series was sampled at  $f_s = 500$  Hz, and  $f_k = \frac{kf_s}{N}$ . We used,  $K=8$  and each block maintained a 50% overlap with adjacent blocks in our analysis.

We also calculated the power spectral density (PSD) using an auto-regressive function

$$S(f) = \frac{\sigma^2}{\left| \sum_{q=0}^{l-1} a(k) e^{-\frac{i2\pi q f k}{f_s}} \right|^2}$$

where  $S(f)$  is equal to the PSD of the original time series. The variance of the noise for the estimated AR model is given as  $\sigma^2$ . The variable  $a$  contains the AR model coefficients, where  $a = [a_0 = 1, a_1, a_2, \dots, a_l]$  and  $l=16$  is the order of the AR estimation. The AR coefficients were estimated by minimizing the sum of the squared  $l$ th order forward prediction errors over the length of the data.

VLF (Very Low Frequency) range: 0.0-0.04 Hz

LF (Low Frequency) range: 0.04-0.15 Hz

HF (High Frequency) range: 0.15-0.4 Hz

### **Complexity Domain:**

**Sample Entropy [2,3]:** Sample Entropy is a nonlinear dynamic analysis method. It can be defined as the negative natural logarithm of the Conditional Probability in a data set of length 'N' that a dataset will repeat itself for 'm+1' points given that the dataset has repeated itself for 'm' points with a tolerance 'r'.

We computed sample entropy in the following steps.

1. The RR interval series ( $x_i$ ), is normalized by the following equation.

$$y_i = \frac{x_i - \mu}{\sqrt{(1/N \sum (x_i - \mu)^2)}}$$

$\mu$  is the mean of the RR interval series.

2. The resulting series  $y_i$  is then inspected for the number of matches within the tolerance range ' $r$ ' for up to a length of  $m$  and  $m+1$  points.
3. The number of matches of  $m+1$  points is divided by the matches of  $m$  points, which gives the conditional probability of  $m+1$  points matching with respect to  $m$  points.
4. The negative natural logarithm of the above ratio is sample entropy.

#### **Scaling coefficients ( $\alpha$ ) from detrended fluctuation analysis [4]**

Following the techniques of Peng et al, we first integrated the tachogram. The integrated tachogram is then divided into  $P$  intervals of equal length, and a least-squares line fit  $y_p(r)$  is found for each interval. The integrated tachogram  $y(r)$  is detrended by subtracting  $y_p(r)$  from  $y(r)$ . The root mean-square fluctuation of this detrended signal is then calculated as

$$F(p) = \sqrt{\frac{1}{R} \sum_{r=1}^R [y(r) - y_r(r)]^2}$$

The fluctuation plot is the graph of the log of  $F(n)$  vs. the log of window size ( $n$ ). We estimated the short-term scaling coefficient  $\alpha_1$  as the slope of the straight line approximation of the fluctuation plot for window sizes from 4 to 31 beats ( $10^{0.5}$  to  $10^{1.5}$ ).

The long-term scaling exponent  $\alpha_2$ , was similarly found as the slope of the straight line approximation of the fluctuation plot for window sizes greater than 100 beats ( $10^2$ ).

1. Welch PD: **The Use of Fast Fourier Transform for the Estimation of Power Spectra: A Method Based on Time Averaging Over Short, Modified Periodograms.** *IEEE Transactions on Audio and Electroacoustics* 1967, **15**(2):70-73.
2. Lake DE, Richman JS, Griffin MP, Moorman JR: **Sample entropy analysis of neonatal heart rate variability.** *Am J Physiol Regul Integr Comp Physiol* 2002, **283**(3):R789-797.
3. Richman JS, Moorman JR: **Physiological time-series analysis using approximate entropy and sample entropy.** *Am J Physiol Heart Circ Physiol* 2000, **278**(6):H2039-2049.
4. Peng CK, Havlin S, Stanley HE, Goldberger AL: **Quantification of scaling exponents and crossover phenomena in nonstationary heartbeat time series.** *Chaos* 1995, **5**(1):82-87.
